# Supplementary material for: Vacuole-mediated selective regulation of TORC1-Sch9 signaling following oxidative stress
Source: PubMed Central journal article supplement — Mol Biol Cell. 2018 Feb 15;29(4):510–22. doi: 10.1091/mbc.E17-09-0553 (PMC6014174; doi:10.1091/mbc.e17-09-0553), 2018-02-15
Supplement: mbc-29-510-s001.pdf [file mbc-29-510-s001.pdf]

# Supplemental Materials

*Molecular Biology of the Cell*

Takeda et al.

1

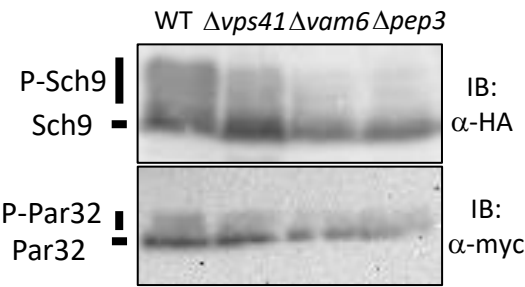

**Supplemental Figure S1:** Western blot analysis of the C-terminal fragment of Sch9-5HA and Par32-13myc. Lysates of WT (yet515), Δ*vps41* (yet582), Δ*vam6* (yet670), and Δ*pep3* (yet723) cells grown in SDC medium were subjected to western blotting.

2

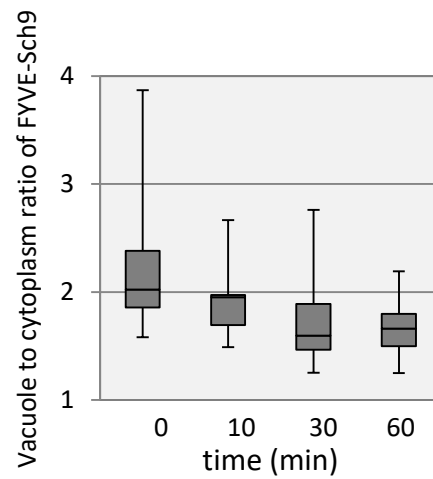

**Supplemental Figure S2:** Quantification of the ratio of FYVE-Sch9 fluorescence intensity of vacuolar membranes to that of the cytoplasm. Related to Figure 6A.

3

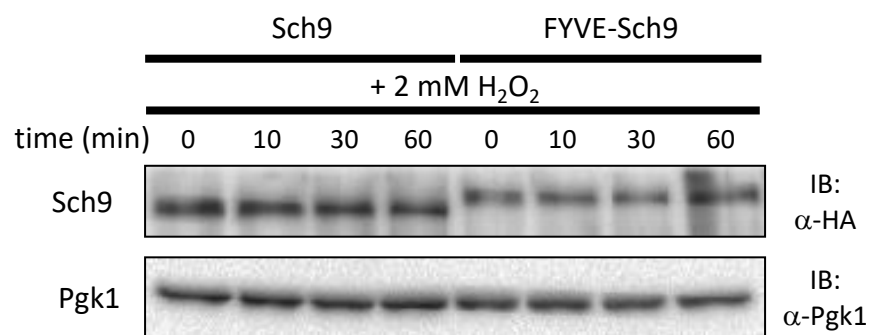

**Supplemental Figure S3:** Western blot analysis of Sch9-5HA (yet628) or FYVE-Sch9-5HA (yet629) with Pgk1 as a loading control. Related to Figure 6B.

4

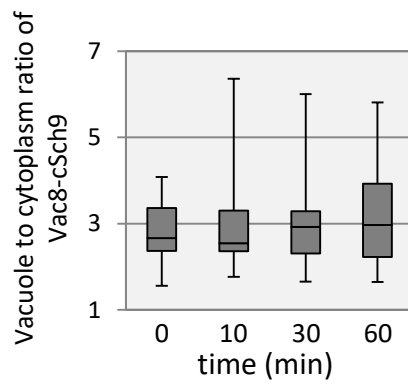

**Supplemental Figure S4:** Quantification of the ratio of Vac8-GFP-cSch9 fluorescence intensity of vacuolar membranes to that of the cytoplasm. Related to Figure 6D.

5

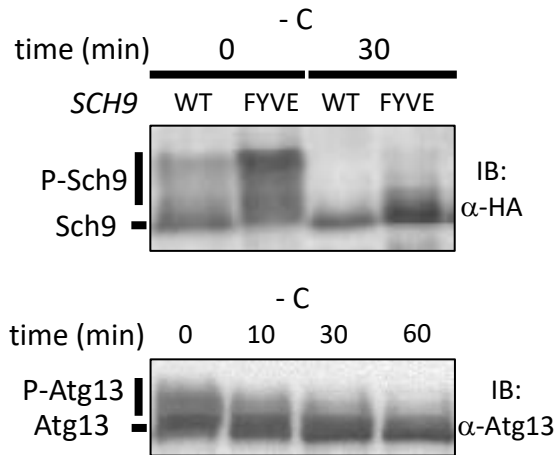

**Supplemental Figure S5:** Western blot analysis of the C-terminal fragment of Sch9-5HA and Atg13. Cells expressing Sch9-5HA (yet628) or FYVE-Sch9-5HA (yet629) were treated with SDC-C medium (carbon starvation) for 30 min during the mid-log phase. Cells overexpressing Atg13 (yet562) on a multi-copy plasmid were treated with SDC-C medium during the mid-log phase in SDC medium. The lysates were subjected to western blotting at each time point.

6

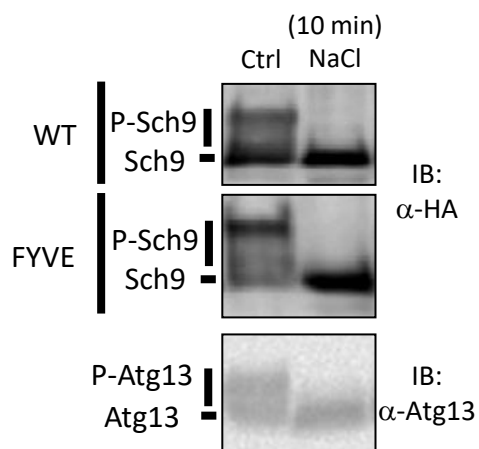

**Supplemental Figure S6:** Western blot analysis of the C-terminal fragment of Sch9-5HA and Atg13. Cells expressing Sch9-5HA (yet628) and FYVE-Sch9-5HA (yet629) were treated with SDC medium + 1 M NaCl (hyperosmotic stress) for 10 min during the mid-log phase. Cells overexpressing Atg13 (yet562) on a multi-copy plasmid were treated with SDC + 1 M NaCl medium for 10 min during the mid-log phase. The lysates were subjected to western blotting at each time point.

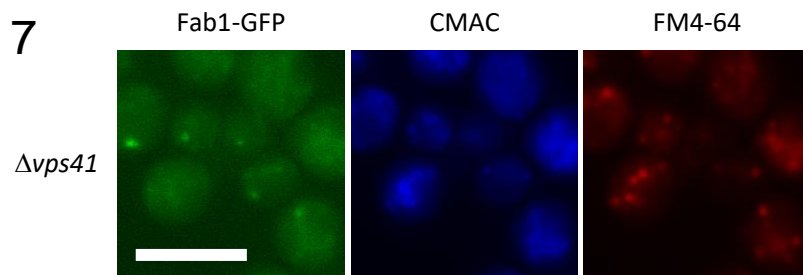

**Supplemental Figure S7:** Representative images of *Δvps41* (yet805) cells expressing Fab1-GFP. Cells at mid-log phase in SDC (+ uracil) medium were stained with CMAC and FM4-64. Scale bar = 5  $\mu$ m.

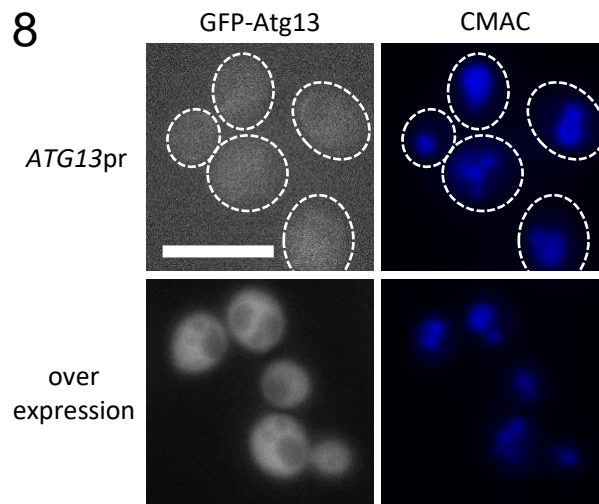

**Supplemental Figure S8:** Representative images of cells expressing GFP-Atg13 from the endogenous *ATG13* promoter or the *TEF* promoter (overexpression). Cells at mid-log phase in SDC (+ uracil) medium were stained with CMAC as a vacuolar marker. Scale bar = 5  $\mu$ m.

|                       | + 2mM H <sub>2</sub> O <sub>2</sub> |             |             |             |
|-----------------------|-------------------------------------|-------------|-------------|-------------|
|                       | 0 min                               | 10 min      | 30 min      | 60 min      |
| PI3P                  | 3.97 ± 0.19                         | 4.64 ± 0.21 | 4.94 ± 0.12 | 4.66 ± 0.16 |
| PI4P                  | 2.38 ± 0.05                         | 3.38 ± 0.01 | 4.07 ± 0.28 | 4.38 ± 0.26 |
| PI(3,5)P <sub>2</sub> | 0.27 ± 0.04                         | 0.29 ± 0.02 | 0.32 ± 0.04 | 0.32 ± 0.04 |
| PI(4,5)P <sub>2</sub> | 1.34 ± 0.05                         | 0.98 ± 0.07 | 1.01 ± 0.05 | 0.98 ± 0.03 |

**Supplemental Table 1:** Changes in the levels of phosphoinositides after oxidative stress.

Values are presented as means ± standard deviation (n = 3).

**Supplemental Table 2: Strains used in this study.**

| <b>Strain</b> | <b>Genotype</b>                                                                      | <b>Figure</b>  | <b>Source</b>    |
|---------------|--------------------------------------------------------------------------------------|----------------|------------------|
| BY4741        | MATa <i>his3Δ1 leu2Δ0 met15Δ0 ura3Δ0</i>                                             | 2A             | Laboratory stock |
| yet38         | BY4741 pRS416- <i>SCH9-5HA</i>                                                       |                | This study       |
| yet515        | yet38 <i>PAR32-13myc::HIS3MX</i>                                                     | 1, 2B, 2D, 5AB | This study       |
| yet571        | yet562 <i>SCH9-5HA::LEU2</i>                                                         |                | This study       |
| yet610        | yet571 <i>NPR1-13myc::HIS3MX</i>                                                     | 1, 2B, 5B,     | This study       |
| yet562        | BY4741 YEp352- <i>ATG13</i>                                                          | 1, 2B, 5AB,    | This study       |
| yet567        | BY4741 $\Delta$ <i>vps41::kanMX</i>                                                  | 2A             | This study       |
| yet576        | BY4741 $\Delta$ <i>ego1::kanMX</i>                                                   | 2A             | This study       |
| yet701        | BY4741 $\Delta$ <i>tco89::kanMX</i>                                                  | 2A             | This study       |
| yet569        | yet515 $\Delta$ <i>vps41::kanMX</i>                                                  | 2BD            | This study       |
| yet577        | yet515 $\Delta$ <i>ego1::kanMX</i>                                                   | 2BD            | This study       |
| yet729        | yet515 $\Delta$ <i>tco89::kanMX</i>                                                  | 2BD            | This study       |
| yet618        | yet610 $\Delta$ <i>vps41::kanMX</i>                                                  | 2B             | This study       |
| yet619        | yet610 $\Delta$ <i>ego1::kanMX</i>                                                   | 2B             | This study       |
| yet780        | yet610 $\Delta$ <i>tco89::kanMX</i>                                                  | 2B             | This study       |
| yet574        | yet562 $\Delta$ <i>vps41::kanMX</i>                                                  | 2B             | This study       |
| yet580        | yet562 $\Delta$ <i>ego1::kanMX</i>                                                   | 2B             | This study       |
| yet726        | yet562 $\Delta$ <i>tco89::kanMX</i>                                                  | 2B             | This study       |
| SKY086-A      | BY4741 $\Delta$ <i>gtr1::kanMX</i> $\Delta$ <i>gtr2::hphMX</i>                       |                | This study       |
| yet593        | SKY086-A <i>PAR32-13myc::HIS3MX</i>                                                  |                | This study       |
| yet634        | yet593 <i>SCH9-5HA::LEU2</i>                                                         |                | This study       |
| yet639        | yet634 pRS316                                                                        | 2E             | This study       |
| yet640        | yet634 pSK122                                                                        | 2E             | This study       |
| yet645        | yet634 pSK127                                                                        | 2E             | This study       |
| yet647        | yet634 pSK129                                                                        | 2E             | This study       |
| yet631        | BY4741 $\Delta$ <i>gtr1::natMX</i> $\Delta$ <i>gtr2::hphMX</i> <i>SCH9-5HA::LEU2</i> |                | This study       |
| yet707        | yet631 <i>PAR32-myc::HIS3MX</i>                                                      |                | This study       |
| yet754        | yet707 $\Delta$ <i>vps41::kanMX</i>                                                  |                | This study       |
| yet755        | yet754 pRS316                                                                        | 2E             | This study       |
| yet756        | yet754 pRS122                                                                        | 2E             | This study       |
| yet761        | yet754 pRS127                                                                        | 2E             | This study       |
| yet763        | yet754 pRS129                                                                        | 2E             | This study       |
| yet120        | BY4741 pSK1                                                                          | 3AB            | This study       |
| yet691        | yet576 pSK1                                                                          | 3A             | This study       |
| yet727        | yet701 pSK1                                                                          | 3A             | This study       |
| yet732        | yet567 pSK1                                                                          | 3B             | This study       |
| SKY374-A      | BY4741 <i>NUP49-mCherry::hphMX</i> <i>GFP-TOR1</i>                                   | 3C             | 2015 Kira        |
| yet665        | SKY374-A $\Delta$ <i>vps41::kanMX</i>                                                | 3C             | This study       |

|        |                                                         |          |            |
|--------|---------------------------------------------------------|----------|------------|
| yet19  | BY4741 <i>SCH9p::GFPΔC-URA3-NOP1p-GFP-SCH9</i>          |          | This study |
| yet36  | yet36 <i>SCH9p::GFP-SCH9</i>                            | 4C       | This study |
| yet231 | BY4741 <i>SCH9p::GFPΔC-URA3-TEF1p-GFP-FYVE-SCH9</i>     |          | This study |
| yet234 | yet231 <i>SCH9p::GFP-FYVE-SCH9</i>                      | 4ACF, 6A | This study |
| yet606 | yet234 <i>Δvps41::kanMX</i>                             | 4A       | This study |
| yet628 | yet36 <i>SCH9p::GFP-SCH9-5HA-LEU2</i>                   | 4B, 6B   | This study |
| yet629 | yet234 <i>SCH9p::GFP-FYVE-SCH9-5HA-LEU2</i>             | 4B, 6B   | This study |
| yet661 | yet628 <i>Δvps41::kanMX</i>                             | 4B       | This study |
| yet662 | yet629 <i>Δvps41::kanMX</i>                             | 4B       | This study |
| yet605 | yet36 <i>Δvps41::kanMX</i>                              | 4C       | This study |
| yet606 | yet234 <i>Δvps41::kanMX</i>                             | 4C       | This study |
| yet653 | BY4741 <i>EGO3-3mCherry::hphMX</i>                      |          | This study |
| yet765 | yet653 pSK1                                             | 5D       | This study |
| yet857 | BY4741 pRS413- <i>VAC8-GFP-csch9-5HA</i>                | 6D       | This study |
| yet859 | BY4741 pRS413 <i>VAC8-csch9-5HA</i>                     | 6D       | This study |
| yet681 | BY4741 <i>ATG18p::GFPΔC-URA3-NOP1p-GFP-ATG18</i>        | 7A       | This study |
| yet709 | yet681 <i>Δvps41::kanMX</i>                             | 7A       | This study |
| yet782 | yet681 <i>Δvac7::kanMX</i>                              | 7A       | This study |
| yet777 | yet681 <i>EGO3-3mCherry::hphMX</i>                      | 7B       | This study |
| yet793 | BY4741 <i>FAB1-GFP::kanMX</i>                           | 7D       | This study |
| yet685 | BY4741 <i>ATG18p::mCherryΔC-URA3-TEFp-mCherry-ATG18</i> |          | This study |
| yet838 | yet685 pTN1015                                          | 7F       | This study |

**Supplemental Table 3: Plasmids used in this study.**

| Plasmid                 | Source                               |
|-------------------------|--------------------------------------|
| pRS416- <i>SCH9-5HA</i> | 2007 Urban <i>et al.</i>             |
| YEp352- <i>ATG13</i>    | 2010 Kamada <i>et al.</i>            |
| pRS316                  | Laboratory stock                     |
| pSK122                  | pRS316- <i>GTR1 GTR2</i>             |
| pSK127                  | pRS316- <i>GTR1(S20L) GTR2(Q66L)</i> |
| pSK129                  | pRS316- <i>GTR1(Q65L) GTR2(S23L)</i> |
| pSK1                    | pRS316- <i>SCH9-2GFP</i>             |
|                         | pRS413- <i>VAC8-GFP-csch9-5HA</i>    |
|                         | 2014 Jin <i>et al.</i>               |
|                         | BY4741 pRS413 <i>VAC8-csch9-5HA</i>  |
|                         | 2014 Jin <i>et al.</i>               |
| pTN1015                 | pRS425- <i>GFP-FYVE</i>              |
|                         | This study                           |
